# Supplementary material for: An MXene/CNTs@P nanohybrid with stable Ti–O–P bonds for enhanced lithium ion storage
Source: Royal Society of Chemistry journal article supplement (doi:10.1039/c9ta07357d), 2019-01-01
Supplement: c9ta07357d1.pdf [file c9ta07357d1.pdf]

## Supporting Information

### **MXene/CNTs@P nanohybrid with stable Ti-O-P bonds for enhanced lithium ion storage**

Shixue Zhang,<sup>a,1</sup> Huan Liu,<sup>b,1</sup> Bin Cao,<sup>a</sup> Qizhen Zhu,<sup>a</sup> Peng Zhang,<sup>a</sup> Xin Zhang,<sup>a</sup> Renjie Chen,<sup>b\*</sup> Feng Wu<sup>b</sup> and Bin Xu<sup>\*a</sup>

<sup>a</sup> State Key Laboratory of Organic-Inorganic Composites, Beijing Key Laboratory of Electrochemical Process and Technology for Materials, Beijing University of Chemical Technology, Beijing, China 100029.

<sup>b</sup> State Key Laboratory of Organic-Inorganic Composites, Beijing Key Laboratory of Electrochemical Process and Technology for Materials, Beijing University of Chemical Technology, Beijing 100029, China

\*Corresponding authors. E-mail: binxumail@163.com, xubin@mail.buct.edu.cn (B. Xu), chenrj@bit.edu.cn (R. Chen)

<sup>1</sup> Shixue Zhang and Huan Liu contributed equally to this work.

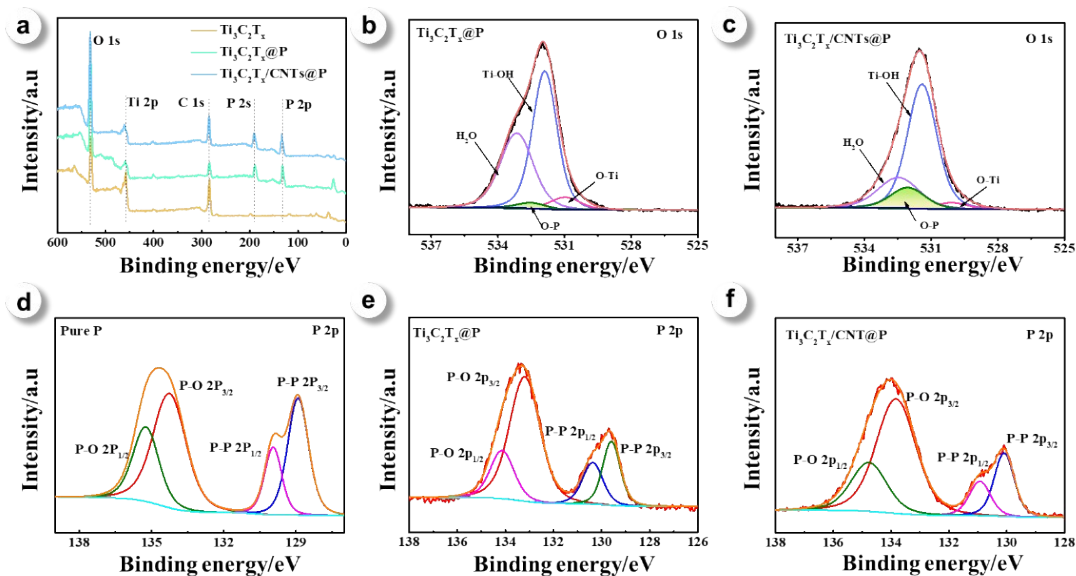

**Fig. S1** XPS survey spectra of the samples (a). The O 1s spectra of  $\text{Ti}_3\text{C}_2\text{T}_x@\text{P}$  (b) and  $\text{Ti}_3\text{C}_2\text{T}_x/\text{CNTs}@\text{P}$  (c). The P 2p spectra of pure red P (d),  $\text{Ti}_3\text{C}_2\text{T}_x@\text{P}$  (e) and  $\text{Ti}_3\text{C}_2\text{T}_x/\text{CNTs}@\text{P}$  (f).

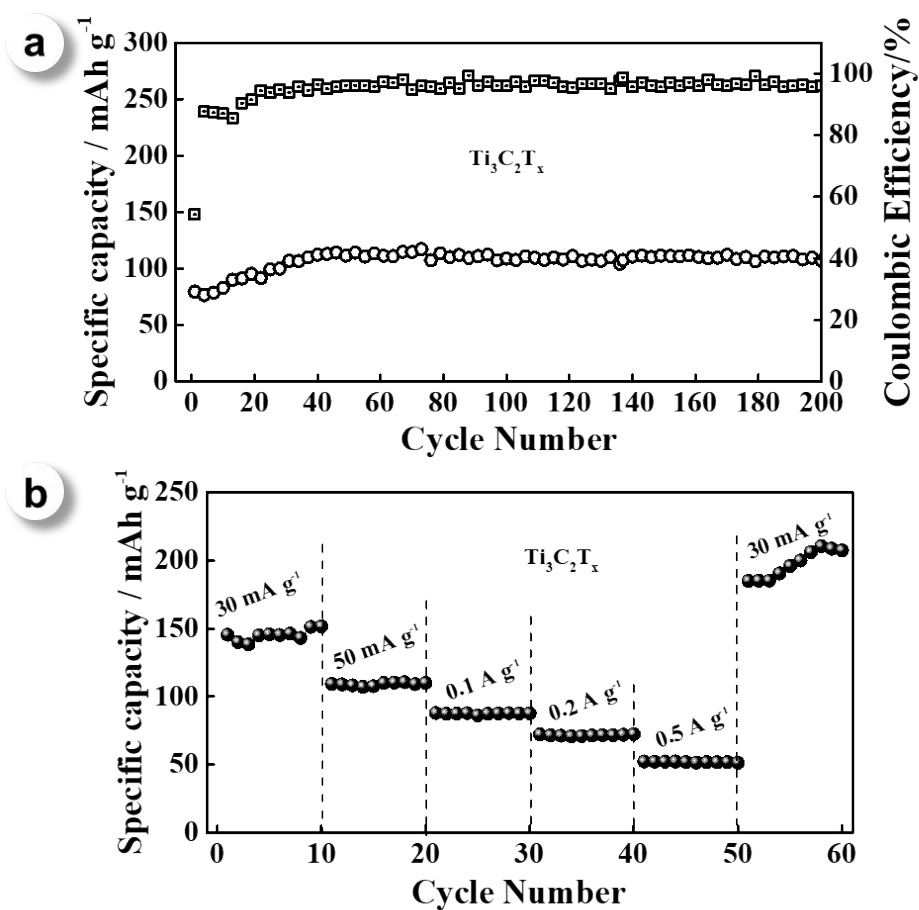

**Fig. S2** Cycle performance and their coulombic efficiencies of Ti<sub>3</sub>C<sub>2</sub>T<sub>x</sub> at a current density of 50 mA g<sup>-1</sup>(a). Rate performance of Ti<sub>3</sub>C<sub>2</sub>T<sub>x</sub> at different current density (b).

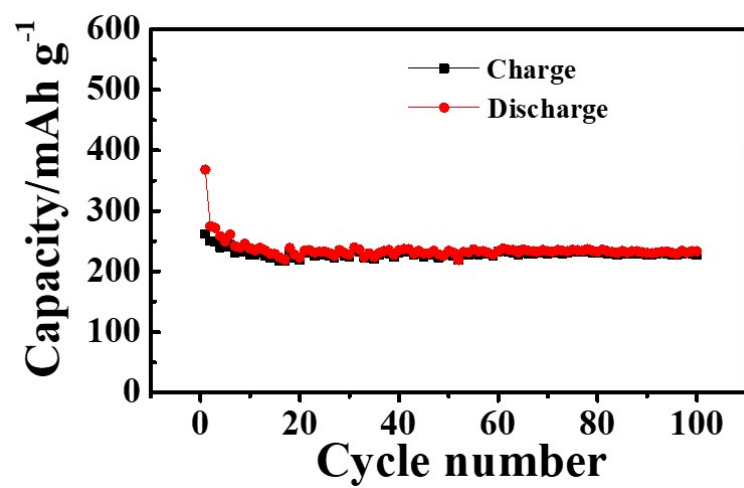

Fig. S3 The cyclability of the pure CNTs anode.

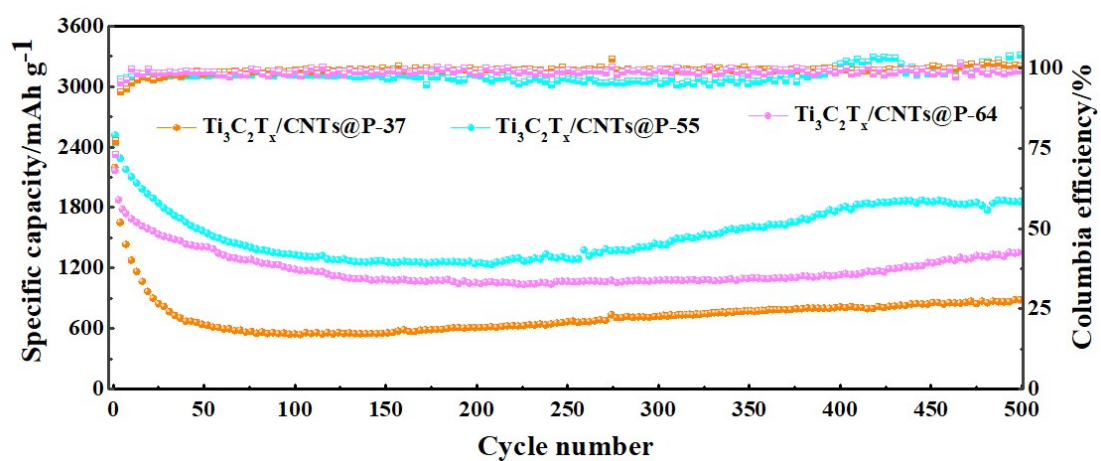

**Fig. S4** Cycle performances of  $\text{Ti}_3\text{C}_2\text{T}_x/\text{CNTs}@P$  hybrids with different mass ratio of  $\text{Ti}_3\text{C}_2\text{T}_x/\text{CNT}$  to P. The mass ratios of  $\text{Ti}_3\text{C}_2\text{T}_x/\text{CNTs}$  to P for  $\text{Ti}_3\text{C}_2\text{T}_x/\text{CNTs}@P-37$ ,  $\text{Ti}_3\text{C}_2\text{T}_x/\text{CNTs}@P-55$  and  $\text{Ti}_3\text{C}_2\text{T}_x/\text{CNTs}@P-64$  are 3:7, 5:5 and 6:4, respectively.

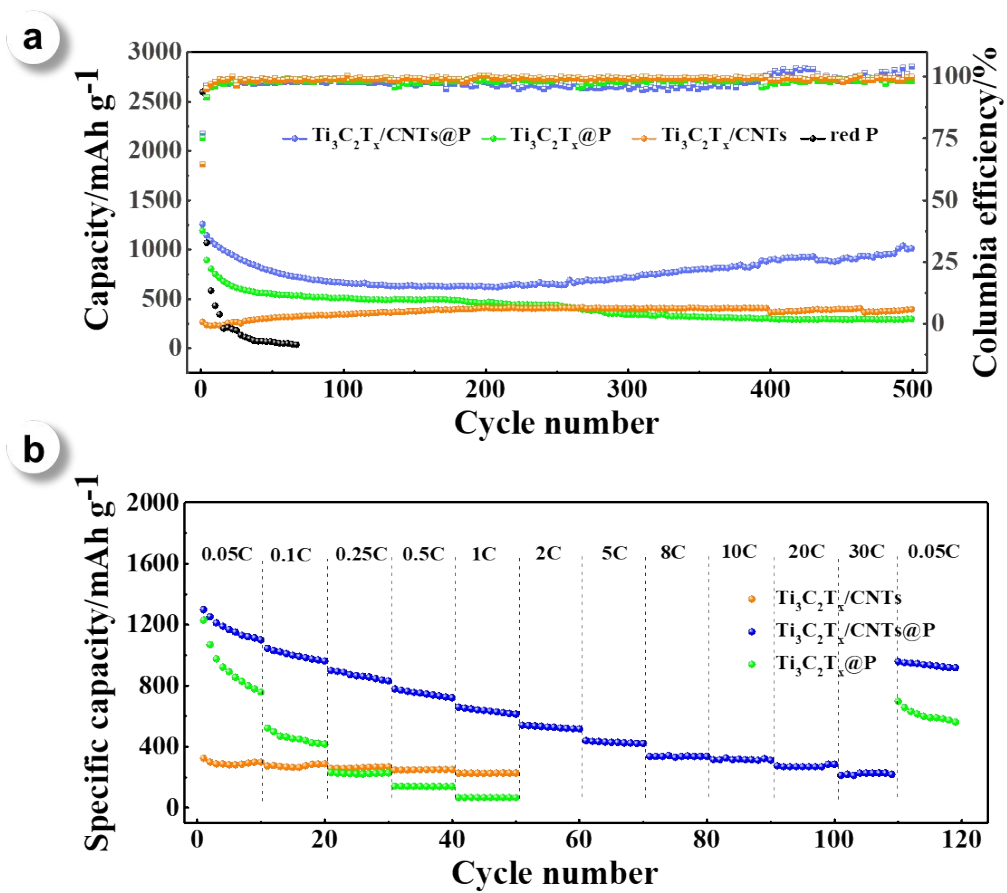

**Fig. S5** Cycle performance and their columbic efficiencies of all composites at a current density of 0.05 C (a). Rate performance of all composites at different current density (b). The specific capacity is calculated based on the mass of composite.

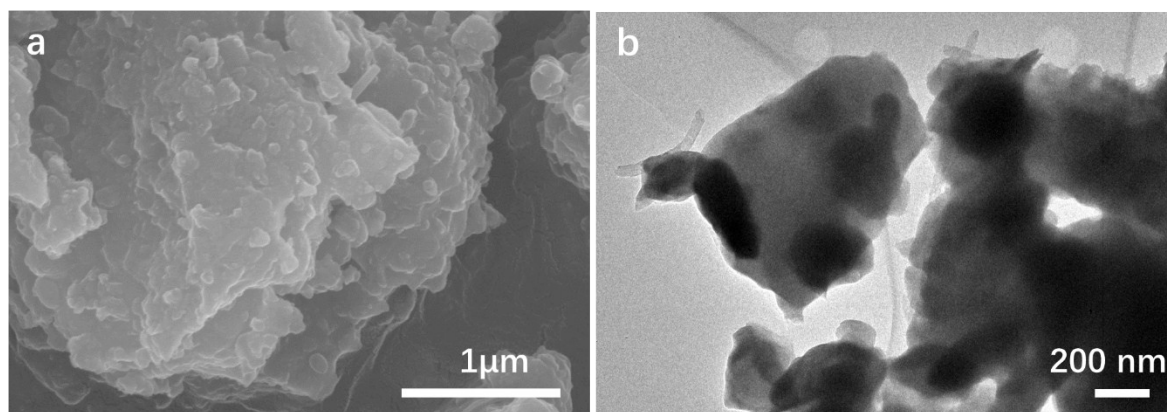

**Fig. S6** SEM (a) and TEM (b) images of  $\text{Ti}_3\text{C}_2\text{T}_x/\text{CNTs}@P$  electrodes after 500<sup>th</sup> cycle.

The cell voltage is linearly proportional to  $\sqrt{\tau}$ , as shown in Fig. S6a. The diffusion coefficient (D) can be calculated from the GITT potential profiles by Fick's second law, as the following equation:

$$D = \frac{4}{\pi\tau} \frac{m_B V_M}{M_B S} \frac{\Delta E_s}{(\Delta E_\tau)^2} \quad (\text{equation S1})$$

The  $\tau$  is the titration time,  $m_B$  is the electrode active material mass, S is the geometric area of the Cu foil electrode,  $\Delta E_s$  is the quasi-thermodynamic equilibrium potential difference before and after the current pulse,  $\Delta E_\tau$  is the potential difference during current pulse,  $V_M$  is the molar volume,  $M_B$  is the molar mass.

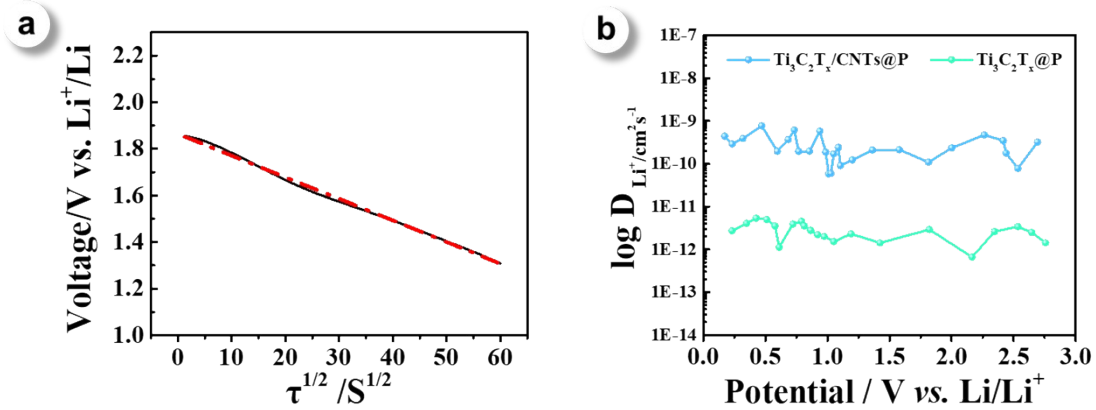

**Fig. S7** Linear behavior of the potential vs.  $\sqrt{\tau}$  relationship in GITT at 1.824 V vs. Li<sup>+</sup>/Li of forth lithiation process of Ti<sub>3</sub>C<sub>2</sub>T<sub>x</sub>/CNTs@P for LIBs (a). Chemical diffusion coefficients of Li<sup>+</sup> as a parameter of voltage calculated by GITT for lithiation (b).
